# Supplementary material
Source: HighWire-hosted journal article supplement (https://drc.bmj.com/content/11/1/e003197)
Supplement: inline-supplementary-material-1 [file inline-supplementary-material-1.pdf]

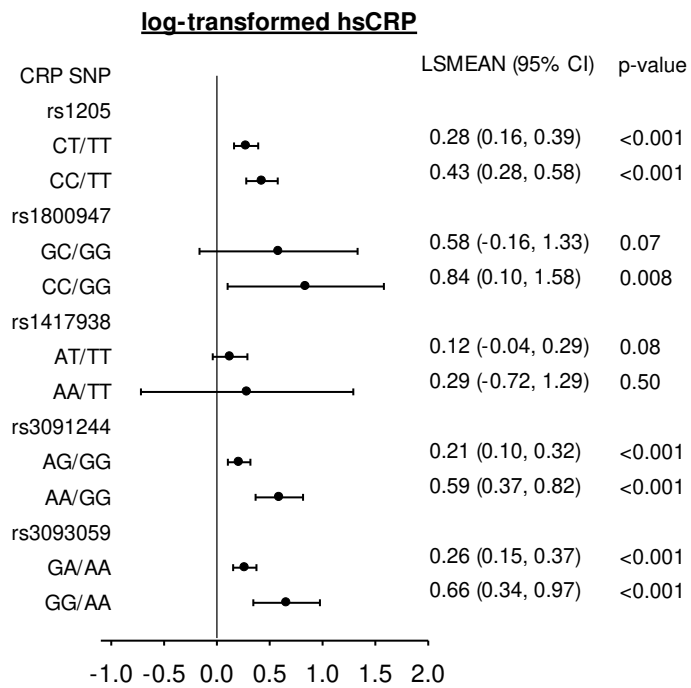

**Supplemental Figure S1.** Adjusted mean differences of log-transformed hsCRP in CRP SNPs

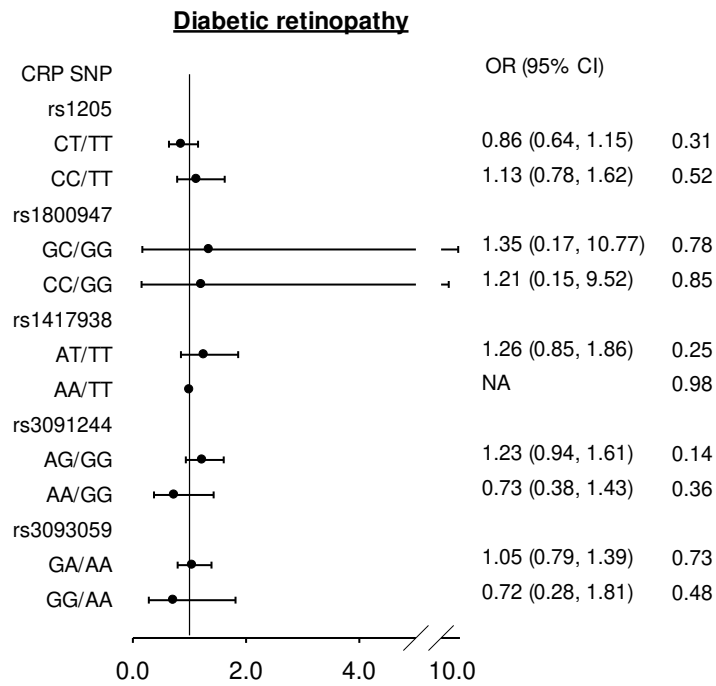

**Supplemental Figure S2.** The odds ratios of CRP SNPs with diabetic retinopathy

**Supplemental Table S1. CRP SNPs list from Taiwan Biobank TWB v2.0**

| SNP         | Function      | Minor (major) allele | CHB MAF             | Out study MAF |
|-------------|---------------|----------------------|---------------------|---------------|
| rs1205      | UTR-3         | C (T)                | 0.452               | 0.434         |
| rs1800947   | Coding region | G (C)                | 0.058               | 0.086         |
| rs34672691  | Coding region | G (A)                | 0.000               | -             |
| rs776402087 | Coding region | Alleles T and C      | -                   | -             |
| rs377351051 | Coding region | Alleles A and G      | -                   | -             |
| rs143101792 | Coding region | C (G)                | 0.000               | -             |
| rs769624182 | splice-3      | Alleles C and G      | -                   | -             |
| rs1417938   | Intron        | A (T)                | 0.078               | 0.056         |
| rs3091244   | nearGene-5    | G (T, A)             | T=0.121,<br>A=0.078 | 0.234         |
| rs3093059   | nearGene-5    | G (A)                | 0.121               | 0.179         |
| rs34188124  | nearGene-5    | C (T)                | 0.058               | 0.024         |

CHB: Han Chinese in Beijing; MAF: minor allele frequency.

MAF data was searched from <https://www.ncbi.nlm.nih.gov/variation/tools/1000genomes/>

**Supplemental Table S2.** Association of hsCRP with diabetic nephropathy in patients with type 2 diabetes

| Variables                                    | Diabetic nephropathy |                     |
|----------------------------------------------|----------------------|---------------------|
|                                              | Crude OR (95% CI)    | Adjusted OR (95%CI) |
| per 1 unit increase in log-transformed hsCRP | 1.17 (1.04, 1.32)*   | 1.15 (1.01, 1.32)*  |

OR: odds ratio; CI: Confidence interval; \*: P<0.05.

Adjusted odds ratio: adjusting for sociodemographic characteristics, lifestyle behaviors and disease history.
